# Supplementary material for: Pushbutton-activated microfluidic cell-free biosensor for multiplexed pathogen detection
Source: Royal Society of Chemistry journal article supplement (doi:10.1039/d5lc00337g), 2025-01-01
Supplement: d5lc00337g1.pdf [file d5lc00337g1.pdf]

# Pushbutton-activated microfluidic cell-free biosensor for multiplexed pathogen detection

Dong Hyun Han,<sup>†a</sup> Yurim Kim,<sup>†a</sup> Yu Jin Park,<sup>b</sup> Dong-Yeon Song,<sup>b</sup> Jongho Park,<sup>a</sup> Jeonghwan Oh,<sup>a</sup> Dong-Myung Kim<sup>\*b</sup> and Je-Kyun Park<sup>\*a</sup>

<sup>a</sup> Department of Bio and Brain Engineering, Korea Advanced Institute of Science and Technology (KAIST), 291 Daehak-ro, Yuseong-gu, Daejeon 34141, Republic of Korea. E-mail: jekyun@kaist.ac.kr; Tel: +82 42 350 4315.

<sup>b</sup> Department of Chemical Engineering and Applied Chemistry, Chungnam National University, 99 Daehak-ro, Daejeon 34134, Republic of Korea. E-mail: dmkim@cnu.ac.kr; Tel: +82 42 821 5899.

<sup>†</sup> These authors contributed equally.

*Supplementary Information includes:*

**Table S1** Sequence information encoding the 16S rRNAs of the target pathogens under the T7 promoter.

**Table S2** Sequence information targeting the 3'-end of each 16S rDNA sequence.

**Table S3** Sequence information of pK7/dT7P-sfGFP constructs.

**Table S4** Sequence information of IA and TASER probes.

**Table S5** Sequence information of IA and TASER probes for *E. coli* before optimization.

**Fig. S1** Schematic of the interconnection between the upper and lower fluidic channels via through-hole.

**Fig. S2** Reproducibility test based on multiple users. Each sample containing 1  $\mu$ M of *E. coli* 16S rRNA was aliquoted and mixed with IA-TASER reagents via the pushbutton operation ( $n = 3$ ).

**Fig. S3** Performance comparison using non-optimized and optimized invasive and flap probes in the IA-TASER assay.

**Fig. S4** Enlarged images of the detection zone showing sfGFP fluorescence signals from various concentrations of 16S rRNA captured with the hand-held transilluminator.

**Fig. S5** Representative image showing the analysis of sfGFP fluorescence intensity in the mPAMD using a smartphone app.

**Table S1.** Sequence information encoding the 16S rRNAs of the target pathogens under the T7 promoter.

| Sequence name        | Sequence                                                                                                                                                                                                                                                                                                                                                                                                                                                                                                                                                                                                                                                                                                                                                                                                                                                                                                                                                                                                                                                                                                                                                                                                                                                                                                                                                                                                                                                                                                                                                                                                                                                                                                                                                                                                                                                                                                                                                                                                                                                                                                                                                                                                                                                                                                                                                                                                                                                                                                                                                                                                                                                                                                                                                                                                                                                                                                                                                                                                                                                                                                                                                                                                                                                                                                                                                                                                                                                                                                                                                                                                                                                                                                                                                                                                                                                                                                                                                                                                                                                                                                                                                                                                     |
|----------------------|--------------------------------------------------------------------------------------------------------------------------------------------------------------------------------------------------------------------------------------------------------------------------------------------------------------------------------------------------------------------------------------------------------------------------------------------------------------------------------------------------------------------------------------------------------------------------------------------------------------------------------------------------------------------------------------------------------------------------------------------------------------------------------------------------------------------------------------------------------------------------------------------------------------------------------------------------------------------------------------------------------------------------------------------------------------------------------------------------------------------------------------------------------------------------------------------------------------------------------------------------------------------------------------------------------------------------------------------------------------------------------------------------------------------------------------------------------------------------------------------------------------------------------------------------------------------------------------------------------------------------------------------------------------------------------------------------------------------------------------------------------------------------------------------------------------------------------------------------------------------------------------------------------------------------------------------------------------------------------------------------------------------------------------------------------------------------------------------------------------------------------------------------------------------------------------------------------------------------------------------------------------------------------------------------------------------------------------------------------------------------------------------------------------------------------------------------------------------------------------------------------------------------------------------------------------------------------------------------------------------------------------------------------------------------------------------------------------------------------------------------------------------------------------------------------------------------------------------------------------------------------------------------------------------------------------------------------------------------------------------------------------------------------------------------------------------------------------------------------------------------------------------------------------------------------------------------------------------------------------------------------------------------------------------------------------------------------------------------------------------------------------------------------------------------------------------------------------------------------------------------------------------------------------------------------------------------------------------------------------------------------------------------------------------------------------------------------------------------------------------------------------------------------------------------------------------------------------------------------------------------------------------------------------------------------------------------------------------------------------------------------------------------------------------------------------------------------------------------------------------------------------------------------------------------------------------------------------|
| T-blunt vector       | <p>AGCGCCAATACGCAAACCGCCTCTCCCGCGCGTGGCCGATTCAATATGCAGCTGGCACGACAGGTTTCCCGACT<br/> GGAAAGCGGGCAGTGTAGCGCAACGCAATTAATGTGAGTTAGCTCACTCATTAGGCACCCCAGGCTTACACTTTATGC<br/> TTCCGGCTCGTATGTTGTGTGGAATTGTGAGCGGATAACAATTTACACAGGAAACAGCTATGACCATGATTACGCCA<br/> AGCTTGGTACCGAGCTCGGATCCACTAGTAACGGCCGCGAGTGTGCTGGAATTCGCCCTNNNNNNNNNNNNNNNN<br/> NNNNNNNNNNNNNNNNNNNNNAGGGCGAATTCTGCAGATATCCATCACACTGGCGGCCGCTCGAGCATGCATCTA<br/> GAGGGCCAATTCGCCCTATAGTGAATCGTATTACAATTCACCTGGCCGCTCGTTTACAACGTCGTGACTGGGAAAACC<br/> CTGGCGTTACCAAACCTTAATCGCCTTGCAGCACATCCCCCTTTCCCGAGCTGGCGTAATAGCGAAGAGGCCCGACC<br/> ATCGCCTTCCCAACAGTTGCGCATACGTACCGAGTTAAGGTTTACACCTATAAAAAGAGAGAGCCGTTATC<br/> GTCTGTTTGTGGATGTACAGAGTGATATTATTGACACGCCGGGGCGACGGATGGTGATCCCCCTGGCCAGTGCACGTC<br/> TGCTGTAGATAAAGTCTCCCGTGAACCTTACCCTGGTGGTGCATATCGGGGATGAAAGCTGGCGCATGATGACCACCG<br/> ATATGGCCAGTGTGCCGGTCTCCGTTATCGGGGAAGAAGTGGCTGATCTCAGCCACCGGAAAAATGACATCAAAAAC<br/> GCCATTAACCTGATGTTCTGGGGAATATAAATGTACAGCATGAGATTATCAAAAAGGATCTTACCTAGACTCCTTTTC<br/> ACGTAGAAAAGCTCCGACGAAACGGTGCACCCCGATGAATGTAGCTACTGGCTATCTGGACAAGGAAAA<br/> CGCAAGCGCAAAGAGAAAGCAGGTAGCTTGCAGTGGGCTTACATGGCGATAGCTAGACTGGGCGGTTTTATGGACAG<br/> CAAGCGAACCGGAATTGCCAGCTGGGGCGCCCTCTGGTAAGGTTGGGAAGCCCTGCAAAGTAAACTGGATGGCTTC<br/> TTGCCGCAAGGATCTGATGGCGCAGGGGATCAAGCTGATCAAGAGACAGGATGAGGATCGTTTCGCATGATTGA<br/> ACAAGATGGATTGCACGCAAGTTCTCCGGCCGTTGGTGTGAGAGGCTATTTCGGCTATGACTGGCAACAACAGACAA<br/> TCGGCTGCTCTGATGCCGCCGTTTCCGGCTGTACGCGCAGGGGCGCCCGTTCTTTTTGTCAAGACCGACCTGTCCGG<br/> TGCCCTGAATGAACTGCAAGACGAGGCAGCGCGCTATCTGGCTGGCCACGACGGGCGTTCTTGCAGCTGTGCT<br/> CGACGTTGTCACTGAAGCGGGAAGGGACTGGCTGTATTTGGCGAAGTCCGGGGCAGGATCTCTGTCACTCACT<br/> TGCTCTCGCGAAGAAGTATCCATCATGGCTGATGCAATCGCGCGGCTGCATACGCTTGAATCCGGCTACCTGCCAT<br/> CGACCACCAAGCGAAACATCGCATCGAGCGAGCACGTAAGGATGGAAGCCGGTCTTGTGATCAGGATGATCTGG<br/> ACGAAGAGCATCAGGGGCTCGCGCCAGCCGAACTGTTCCGCAAGGCTCAAGGCGAGCATGCCCGACGGCAGGATCTC<br/> GTCGTGACCCATGGCGATGCCTGCTTGCAGAAATCATGTTGGAAAAATGGCCGCTTTTGTGATTCACTGACTGTGGC<br/> CGGCTGGGTGGCGGACCCGCTACGAGCATAGCGTTGGCTACCCGATATTGCTGAAGATATTGCTGCGCCGCAATG<br/> GGCTGACCGCTTCTCTGTGCTTACCGTATCGCGCTCCCGATTCGACGCGCATCGCTTATCGCCTTCTTACGAG<br/> TTCTTCTGAATTGAAAAAGGAAGAGTATGAGTATTCAACATTTCCGTGTGCGCCCTATTCCCTTTTTGCGGCATTTTGC<br/> CTTCTGTTTTTGTCTACCCAGAAACGCTGGTGAAGTAAAAGATGCTGAAGATCAGTTGGGTGCACGAGTGGGTTAC<br/> ATCGAAGTGGATCAACAGCGGTAAGATCCTTGTAGAGTTTTCGCCCCGAAGAAGCTTTTCAATGATGAGCACTTTT<br/> AAAGTCTGCTATGTGGCGCGGATTATCCCGTATTGACGCCGGCAAGAGCAACTCGGTCGCCGCATCACTATTCT<br/> CAGAATGACTTGGTTGAGTACTCACCAGTCACAGAAAAGCATCTTACGGATGGCATGACAGTAAGAGAATTATGCAG<br/> TGCTGCCATAACCATGAGTGATAAACAATGCGGCCAACTTACTTCTGACAACGATCGGAGGACCGAAGGAGCTAACCG<br/> CTTTTTTGCACAACATGGGGGATCATGTAATCGCCTTGTGCTGGGAACCGGAGCTGAATGAAGCCATAACAAACG<br/> ACGAGCGTGACACCACGATGCCTGTAGCAATGGCAACAACGTTGCGCAAACTATTAACCTGGCGAATCACTACTAG<br/> CTTCCCGGCAACAATTAATAGACTGGATGGAGGCGGATAAAGTTGCAGGACCACTTCTGCGCTCGGCCCTTCCGGCTG<br/> GCTGGTTTTATTGCTGATAAATCTGGAGCCGGTGAAGGTTGGTCTCGCGGTATCATTGCAGCACTGGGGCCAGATGGTA<br/> AGCCTTCCCGTATCGTAGTTATCTACACGACGGGGAGCCAGGCAACTATGGATGAACGAAATAGACAGATCGTGTAG<br/> ATTTGCTCCTCACTGATTAAGCATTGGTAAGTGTACAGCAACGTTTACTCATATATACTGATTGATTTAAAACCTC<br/> ATTTTTAATTTAAAAGGATCTAGGTGAAGATCCTTTTTGATAATCTCATGACCAAAAATCCCTAACGTTAGTTTTCGTT<br/> CCACTGAGCGTACAGCCCGTAGAAAAGATCAAAGGATCTTCTTGTAGATCCTTTTTTCTGCGGTAATCTGTGCTGTG<br/> CAAAACAAAAAACACCGCTACCAGCGGTGGTTTGTGGCCGATCAAGAGCTACCAACTCTTTTTCCGAAGGTAAC<br/> GGCTTCCAGCAGCGCAGATACCAAACTGTTCTTCTAGTGTAGCCGATGTTAGGCCACCCTCAAGAAGCTGTGA<br/> GCACCGCTACATACTCGCTCTGCTAATCCTGTTACTAGTGGCTGCTGCCAGTGGCGATAAGTGTGCTTACCAGG<br/> TGGATTCAAGACGATAGTTACCGGATAAAGGCGCAGCGGTGGGCTGAACGGGGGTTCTGTGCACACAGCCAGCTTG<br/> GAGCGAACGACCTACACGAACTGAGATACCTACAGCTGAGCTATGAGAAAAGCGCCACGCTTCCGAAAGGGAGAAA<br/> GGCGGACAGGTATCCGGTAAGCGCGAGGTCGGAACAGGAGCGCACGAGGGAGCTTCCAGGGGAAACGCGCTGG<br/> TATCTTTATAGCTGTGCGGTTTCCGCCACTCTGACTTACGCTGATTTTTTGTGATGCTCAGGGGGCGGAGCC<br/> TATGAAAAACGCCAGCAACGCGCCTTTTTACGGTCTCTGGCCTTTTGTGCTGCTTGTGCTCATGTTCTTTCTCTGC<br/> GTTATCCCCTGATTCTGTGGATAACCGTATTACCCTTTGAGTGAGCTGATACCGCTCGCCGACGCCGAACGACCGA<br/> CGCGACGCAATCAGTGAGCGAGGAAGCGGAAG</p> |
| <i>F. tularensis</i> | <p>TAATACGACTACTATAGGGGTAACAGGTTTAGGATGCTGACGAGTGGCGACGGGTGAGTAACCGGTAGGAATCT<br/> GTCCATTTGAGGGGGATAACCAGTTGGAACGACTGTTAATACCGCATAATATCTGTGGATTAAGGTTGGCTTTCGGGC<br/> TGTCGAGATGGATGAGCCTGCGTTGGATTAGCTAGTTGGTGGGGTAAGGGCCACCAAGGCTACGATCCATAGCTGA<br/> TTTGTAGAGGATGATCAGCCACATTGGGACTGAGACCGGCCAAAACCTCTACGGGAGGCGAGCAGTGGGGAATATTGG<br/> ACAATGGGGGCAACCCTGATCCAGCAATGCCATGTGTGTAAGAGGCCCTAGGGTTGTAAGCACTTTAGTTGGG<br/> AGGAAAGCCTCAAGGTTAATAGCCTTGGGGGAGGACGTTTACCAAAAAGAAATAAGCACCAGCTTAACTCGTGCCAGCAG<br/> CCGCGGTAATACGGGGGTGCAAGCGTTAATCGGAATTACTGGGCGTAAAGGTTCTGTAGGTGGTTTGTAAAGTCAG<br/> ATGTGAAAAGCCCAGGGTCAACCTTGGAACTGCATTTGATACTGGCAAACCTAGAGTACGGTAGAGGAATGGGGAATT<br/> TCTGGTGTAGCGGTGAAATGCGTAGAGATCAGAAGGAACACCAATGGCGAAGGCAACATTCTGGACCGATACTGACA<br/> CTGAGGGACGAAAAGCGTGGGGATCAAAACAGGATTAGATAACCCTGGTAGTCCACGCTGTAAACGATGAGTACTG<br/> TTGGAGTCCGTTGTAAGGCTCTAGTGGCGCAGCTAACCGGATAAGTACTCCGCTGGGGACTACGGCCGCAAGGCTA<br/> AACTCAAAGGAATTGACGGGGACCCGCACAAGCGGTGGAGCATGTGGTTTAAATTCGATGCAACGCGAAGAACCTTA<br/> CCTGGTCTTGACATCCTGCGAACTTTCTAGAGATAGATTGGTGCCTTCCGGAAACGCGAGTACAGGTTGCACGGCTG<br/> TGTGAGCTGTTGTGAAAATGTTGGTTAAGTGGTCCCGCAACGACGCGCAACCCTATTGATAGTTACATCATTAAAGTT<br/> GGGTACTCTATTGAGACTGCCGCTGACAAGGCGGAGGAAGTGGGGACGACGTCAGTCAATCATGGCCCTTACGACC<br/> AGGGTACACACGTGCTACAATGGGTATTACAGAGGGCTGCGAAGGTGCGAGCTGGAGCGAAACTCAAAAAGTACT<br/> CTTAGTCCGGATTGCACTGCAACTCGATGAAAGTCCGAAATCGCTAGTAATCGCAGGTCAGAATACTGCGGTG<br/> AATACGTTCCCGGCTTTGTACACACCGCCCTCACACCATGGGAGTGGGTTGCTCCAGAAGTAGATAGCTTAAACGAA<br/> TGGCGCTTACACCGGATGATTTCATGACTGGGTTG</p>                                                                                                                                                                                                                                                                                                                                                                                                                                                                                                                                                                                                                                                                                                                                                                                                                                                                                                                                                                                                                                                                                                                                                                                                                                                                                                                                                                                                                                                                                                                                                                                                                                                                                                                                                                                                                                                                                                                                                                                                                                                                                                                                                                                                                                                                                                                                                                                                                                                                                                                                                                                                                        |

|                    |                                                                                                                                                                                                                                                                                                                                                                                                                                                                                                                                                                                                                                                                                                                                                                                                                                                                                                                                                                                                                                                                                                                                                                                                                                                                                                                                                                                                                                                                                                                                                           |
|--------------------|-----------------------------------------------------------------------------------------------------------------------------------------------------------------------------------------------------------------------------------------------------------------------------------------------------------------------------------------------------------------------------------------------------------------------------------------------------------------------------------------------------------------------------------------------------------------------------------------------------------------------------------------------------------------------------------------------------------------------------------------------------------------------------------------------------------------------------------------------------------------------------------------------------------------------------------------------------------------------------------------------------------------------------------------------------------------------------------------------------------------------------------------------------------------------------------------------------------------------------------------------------------------------------------------------------------------------------------------------------------------------------------------------------------------------------------------------------------------------------------------------------------------------------------------------------------|
| <i>Y. pestis</i>   | TAATACGACTCACTATAGGGGCAGCGGGAAGTAGTTACTACTTTGCCGGCAGCGGGCGACGGGTGAGTAATGTCT<br>GGGGATCTGCCTGATGGAGGGGGATAACTACTGGAAACGGTAGCTAATACCGCATGACCTCGCAAGAGCAAAGTGGG<br>GGACCTTAGGGCCTCACGCCATCGGATGAACCCAGATGGGATTAGCTAGTAGGTGGGGTAATGGCTCACCTAGGCGA<br>CGATCCCTAGCTGGTCTGAGAGGATGACCAGCCACACTGGAAGTACGACACGGTCCAGACTCTACGGGAGGCAGCA<br>GTGGGGAATATTGCACAATGGGGCGAAGCCTGATGCAGCCATGCCGCGTGTGTGAAGAAGGCCTTCGGGTTGTAAG<br>CACTTTCAGCGAGGAGGAAGGGGTTGAGTTAATACGCTCAATCATTGACGTTACTCGCAGAAGAAGCACCGGCTAA<br>CTCCGTGCCAGCAGCCGCGTAATACGGGAGGTTGAGCGTGAACCGGTTAATCGGAATTACTGGGCGTAAAGCGCACGAGGCG<br>GTTTGTTAAGTCAGATGTGAAATCCCGCGCTAACGTGGGAAGTGCATTTGAAACTGGCAAGCTAGAGTCTTGTA<br>GGGGGTAGAATTCCAGGTGTAGCGGTGAAATGCGTAGAGATCTGGAGGAATACCGGTGGCGAAGGCGGCCCTGG<br>ACAAAGACTGACGCTCAGGTGCGAAAGCGTGGGGAGCAAACAGGATTAGATACCCTGGTAGTCCACGCTGTAAACGA<br>TGTCGACTTGGAGGTTGTGCCCTTGAGGCGTGGCTTCCGGAGTACCGGTTAAGTCGACCCGCTGGGAGTACGGCC<br>GCAAGGTTAAACTCAAATGAATTGACGGGGGCCGCAAGCGGTGGAGCATGTGGTTAATTCGATGCAACGCGA<br>AGAACCTTACCTACTCTTGACATCCACAGAATTGGCAGAGATGCTAAAGTGCCTTCGGGAAGTGTGAGACAGGTGCT<br>GCATGGCTGTCTCAGCTCGTGTGTGAAATGTTGGGTTAAGTCCCGCAACGAGCGCAACCCCTATCCTTTGTTGCCAG<br>CACCAATGGGAACTCAAGGGAGACTGCGCGAAGGAGGAAAGGTTGGGATGAGTGCCTTACGTTGAGTGCCTTACG<br>GCCCTTACGAGTAGGGCTACACACGTGCTACAATGGCAGATACAAAGTGAAGCGAACTCGCGAGAGCCAGCGGACCA<br>CATAAAGTCTGTCTAGTCCGGATTGGAGTCTGCAACTCGACTCCATGAAGTCGGAATCGCTAGTAATCGTAGATCAG<br>AATGCTACGGTGAATACGTTCCCGGGCCTGTACACACCCCGCTCACACCATGGGAGTGGGTTGCAAAAAGAAGTAG<br>GTAGCTTAACCTTCGGGAGGGCGCTTACCACTTTGTGATTCTACTGACTGGGGTG |
| <i>V. cholerae</i> | TAATACGACTCACTATAGGGGCAGCAGAGGAATTGTTCTTGGGTGGCGAGCGGGCGACGGGTGAGTAATGCCT<br>GGGAAATTGCCCGGTAGAGGGGGATAACCATTGGAACGATGGCTAATACCGCATAACCTCGCAAGAGCAAAGCAG<br>GGGACCTTCGGGCCTTGCCTACCGGATATGCCAGGTGGGATTAGCTAGTTGGTGAGGTAAGGGCTCACCAAGGCG<br>ACGATCCCTAGCTGGTCTGAGAGGATGATCAGCCACACTGGAAGTACGACACGGTCCAGACTCCTACGGGAGGCAGC<br>AGTGGGGAATATTGCACAATGGGGCGCAAGCCTGATGCAGCCATGCCGCGTGTATGAAGAAGGCCTTCGGGTTGTA<br>GTACTTTCAGTAGGGAGGAAGGTGGTTAAGTTAATACCTTAATCATTGACGTTACTACAGAAGAAGCACCGGCTAA<br>CTCCGTGCCAGCAGCCGCGTAATACGGAGGGTGCAAGCGTTAATCGGAATTACTGGGCGTAAAGCGCATGCAGGTG<br>GTTTGTTAAGTCAGATGTGAAAGCCTGGGCTAACCTAGGAATCGCATTTGAAACTGACAAGCTAGAGTACTGTAGA<br>GGGGGTGAGAAATTCAGGTGTAGCGGTGAAATGGCTAGAGATCTGAAGGAATACCGGTGGCGAAGGCGGCCCTGG<br>ACAGATACTGACACTCAGATGCGAAAGCGTGGGGAGCAAACAGGATTAGATACCCTGGTAGTCCACGCCGTAACCGA<br>TGTCTACTTGGAGTTGTGCCCTAGAGGGCGTGGCTTCCGAGCTAACCGGTTAAGTAGACCGCCTGGGAGTACGGTC<br>GCAAGATTAATACTCAAATGAATTGACGGGGGCCGCAAGCGGTGGAGCATGTGGTTAATTCGATGCAACGCGA<br>AGAACCTTACCTACTCTTGACATCCAGAGAATCTAGCGGAGACGCTGGAGTGCCTTCGGGAGCTCTGAGACAGGTGCT<br>GCATGGCTGTCTCAGCTCGTGTGTGAAATGTTGGGTTAAGTCCCGCAACGAGCGCAACCCCTATCCTTTGTTGCCAG<br>CACGTAATGGTGGGAACTCCAGGGAGACTGCCGGTATAAACCGGAGGAAGGTGGGACGACGTCAAGTCATCATGG<br>CCCTACGAGTAGGGCTACACACGTGCTACAATGGCTATACAGAGGGCAGCGAAACCGCGAAGGTGAGCGAATCTC<br>ACAAAGTACGTCGTAGTCCGGATTGGAGTCTGCAACTCGACTCCATGAAGTCGGAATCGCTAGTAATCGCAAATCAGA<br>ATGTTGCGGTGAATACGTTCCCGGGCCTTGTACACACCCCGCTCACACCATGGGAGTGGGCTGCAAAAAGAAGCAGG<br>TAGTTTAACTTCGGGAGGACGCTTGCCACTTTGTGGTTCATGACTGGGGTG          |
| <i>E. coli</i>     | TAATACGACTCACTATAGGGGTAACAGGAAGAAGCTTGCTTCTTGCTGACGAGTGGCGGACGGGTGAGTAATGTCTG<br>GGAAACTGCCTGATGGAGGGGGATAACTACTGGAAACGGTAGCTAATACCGCATAACGTCGCAAGACCAAAGAGGG<br>GGACCTTCGGGCCTTGGCATCGGATGTGCCAGATGGGATTAGCTAGTAGGTGGGGTAACGGCTCACCTAGGCGAC<br>GATCCCTAGCTGGTCTGAGAGGATGACCAGCCACACTGGAATTGAGACACGGTCCAGACTCCTACGGGAGGCAGCAG<br>TGGGGAATATTGCACAATGGGGCGAAGCCTGATGCAGCCATGCCGCGTGTATGAAGAAGGCCTTCGGGTTGTAAGT<br>ACTTTCAGCGGGGAGGAAGGGAGTAAAGTTAATACCTTTGCTCATTGACGTTACCCGCGAAGAAGCACCGGCTAAC<br>TCCGTGCCAGCAGCCGCGTAATACGGAGGGTGAACGCTTAATCGGAATTACTGGGCGTAAAGCGCACGACGGCGG<br>TTTGTTAAGTCAGATGTGAAATCCCGGGCTAACCTGGGAAGTGCATCTGATACTGGCAAGCTTGAAGTCTCGTAGAG<br>GGGGGTAGAATTCCAGGTGTAGCGGTGAAATGCGTAGAGATCTGGAGGAATACCGGTGGCGAAGGCGGCCCTTGG<br>CGAAGACTGACGCTCAGGTGCGAAAGCGTGGGGAGCAAACAGGATTAGATACCCTGGTAGTCCACGCCGTAACGAT<br>GTCGACTTGGAGGTTGTGCCCTTGAGGCGTGGCTTCCGGAGCTAACCGGTTAAGTCGACCGCCTGGGGAGTACGGCCG<br>CAAGGTTAAACTCAAATGAATTGACGGGGGCCGCAAGCGGTGGAGCATGTGGTTAATTCGATGCAACGCGAA<br>GAACCTTACCTGGTCTTGACATCCACAGAATTTCCAGAGATGGATTGGTGCCTTCGGGAAGTGTGAGACAGGTGCTG<br>CATGGCTGTCTCAGCTCGTGTGTGAAATGTTGGGTTAAGTCCCGCAACGAGCGCAACCCCTATCTTTGTTGCCAGC<br>GGTCCGGCCGGGAATCAAAGGAGACTGCCAGTGATAAACTGGAGGAAGGTGGGGATGACGTCAAGTCATCATGGCC<br>CTTAGCACCAGGGCTACACACGTGCTACAATGGCGCATACAAAGAGAAGCGACCTCGCGAGAGCAAAGCGACCTCAT<br>AAAGTGCCTCGTAGTCCGGATTGGAGTCTGCAACTCGACTCCATGAAGTCGGAATCGCTAGTAATCGTGGATCAGAAT<br>GCCACGGTGAATACGTTCCCGGGCCTGTACACACCCCGCTCACACCATGGGAGTGGGTTGCAAAAAGAAGTAGGTA<br>GCTTAACTTCGGGAGGGCGCTTACCACTTTGTGATTCTACTGACTGGGGTG     |

|                        |                                                                                                                                                                                                                                                                                                                                                                                                                                                                                                                                                                                                                                                                                                                                                                                                                                                                                                                                                                                                                                                                                                                                                                                                                                                                                                                                                                                                                                                                                                                                                                                        |
|------------------------|----------------------------------------------------------------------------------------------------------------------------------------------------------------------------------------------------------------------------------------------------------------------------------------------------------------------------------------------------------------------------------------------------------------------------------------------------------------------------------------------------------------------------------------------------------------------------------------------------------------------------------------------------------------------------------------------------------------------------------------------------------------------------------------------------------------------------------------------------------------------------------------------------------------------------------------------------------------------------------------------------------------------------------------------------------------------------------------------------------------------------------------------------------------------------------------------------------------------------------------------------------------------------------------------------------------------------------------------------------------------------------------------------------------------------------------------------------------------------------------------------------------------------------------------------------------------------------------|
| <i>B. pseudomallei</i> | <p>TAATACGACTCACTATAGGGGACGACACGGGCTTCGGCCCTGGTGGCGAGTGGCGAACCGGGTGAAGTAATACATCGGAAC<br/> ATGTCCTGTAGTGGGGATAGCCCGGCGAAAGCCGGATTAATACCGCATAACGATCTAAGGATGAAAGCGGGGACCT<br/> TCGGGCTCGCGCTATAGGGTTGGCCGATGGCTGATTAGCTAGTTGGTGGGGTAAAGGCCTACCAAGGCGACGATCA<br/> GTAGCTGGTCTGAGAGGACGACCAGCCACTGGGACTGAGACACGGCCAGACTCTACGGGAGGCAGCAGTGGGG<br/> AATTTTGGACAATGGGCGCAAGCCTGATCCAGCAATGCCGCTGTGTGAAGAAGGCCTTCGGGTTGTAAAGCACTTTT<br/> GTCCGAAAGAAATCATTCTGGCTAATACCCGGAGTGGATGACGGTACCGGAAGAATAAGCACCCGGCTAACTACTGTG<br/> CCAGCAGCCCGGTAATACGTAGGGTGGAGCGTAACTCGAAGTACTGGGCGTAAAGCGTGGCGGGGTTTGGCT<br/> AAGACCGATGTGAAATCCCGGGCTCAACTGGGAAGTGCATTGGTACTGGCAGGCTAGAGTATGGCAGAGGGGGG<br/> TAGAATTCACGTGTAGCAGTAAATGCGTAGAGATGTGGAGGAATACCGATGGCGAAGGCAGCCCCCTGGGCCAAT<br/> ACTGACGCTCATGCACGAAAGCGTGGGGAGCAAAACAGGATTAGTACCCTGGTAGTCCACGCCCTAAACGATGTCAA<br/> CTAGTTGTTGGGGATTCAATTCCTTAGTAACGTAGCTAACCGGTGAAGTTGACCGCTGGGGAGTACGGTCGCAAGAT<br/> TAAACTCAAAGGAATTGACGGGGACCCGCAACGCGGTGGATGATGTGGATTAATTCGATGCAACGCGAAAAACCT<br/> TACCTACCCTTGACATGGTCGGAAGCCCCGATGAGAGTTGGGCGTGTCTGAAAGAGAACCAGCGCGCACAGGTGCTGCAT<br/> GGCTGTGCTCAGCTCGTGTGATGAGTGTGGGTTAAGTCCCGCAACGAGCGCAACCCCTGTCTTAGTTGCTACGCA<br/> GAGCAACTCTAAGGAGACTGCCGGTACAAACCGGAGGAAGTGGGGATGACGTCAAGTCTGGCGGAGCAATTCAGG<br/> TAGGGCTTACACGTCATACAATGGTCGGAACAGAGGGTCCGCAACCCCGGAGGGGGAGCCAATCCAGAAAAACCGA<br/> TCGTAGTCCGGATTGCACTCTGCAACTCGAGTGCATGAAGCTGGAATCGCTAGTAATCGCGGATCAGCATGCCGCGGT<br/> GAATACGTTCCCGGGTCTTGTACACACCCCGCTCACACCGATGGGAGTGGGTTTTACCAGAAGTGGCTAGTCTAACC<br/> CAAGGAGCAGGTCACCACGGTAGGATTCATGACTGGGTG</p> |
| <i>R. conorii</i>      | <p>TAATACGACTCACTATAGGGGACTAATTGGGGCTTGTCTCAGTTAGTTAGTGGCAGACGGGTGAGTAACACGTGGGA<br/> ATCTACCCATTAGTACGGAATAACTTTTAAAAATAAAAGCTAATACCGTATATTTCTGCGGAGGAAAGATTTATCGC<br/> TGATGGATGAGCCCGCTCAGATTAGGTAGTTGGTGAAGTAATGGCTACCAAGCCGACGATCTGTAGCTGGTCTGAG<br/> AGGATGATCAGCCACTGGGACTGAGACACGGCCAGACTCTACGGGAGGCAGCAGTGGGGAATATTGGACAATG<br/> GGCAAAGCTGATCCAGCAATACCGAGTGAAGTGAAGCTTACGGGTTGTAAGGTTGTAAGGCTTTTAGCAAGGAAGATA<br/> ATGACGTTACTTGCAGAAAAAGCCCCGCTAACTCCGTGCCAGCAGCCGCGTAAGACGGAGGGGGCTAGCGTTGTT<br/> CGGAATTAAGTGGCGTAAAGAGTGCAGTGGGTTTGTAGTAAAGTGAAGTGAAGCCCGGGGCTAACCTCGGAATT<br/> GCTTTAAAACTACTAATCTAGAGTGTAGTGGGGATGATGGAATTCCTAGTGTAGAGGTGAAATTCCTAGATATTG<br/> GAGAAACACCGGTGGCGAAGGCGGTCTATCTGGGACTGACAGCTGATGCACGAAACCGGAGCAAAACAGG<br/> ATTAGATACCCTGGTAGTCCACGCGTAAACGATGAGTGTAGATATCGGAAGATTCTTTTCGGTTTCGACGCTAAC<br/> GCATTAAGCACTCCGCTGGGGAGTACGGTCCGAAGATTAACACTCAAAGGAATTGACGGGGGCTCGCACAAAGCGGT<br/> GGAGCATGCGGTTAATTCGATGTTACGCGAAAAACCTTACCAACCCTTGACATGGTGGTCCGCGGATCGCAGAGATGC<br/> TTTTCTAGCTCGGCTGGACCACACAGGTGTGATGGTGTGCTCAGCTCGTGTGAGTGTGGTGTAAAGTCT<br/> CCGCAACGAGCGCAACCCCTATTCTTATTTGCCAGCGGGTATGCCGGAACTATAAGAAAACTGCCGGTATAAGCC<br/> GGAGGAAGGTGGGGACGACGTCAGTCAATCATGCGCCTTACGGGTTGGGCTACACGCGTGTACAATGGTGTTTACA<br/> GAGGGAAGCAAGACGGCGACGTGGAGCAAAATCCCTAAAAAGACATCTCAGTTCGGATTGTTCTCTGCAACTCGAGAGC<br/> ATGAAGTTGGAATCGCTAGTAATCGCGGATCAGCATGCCGCGTGAATACGTTCTCGGGCCTGTACACACTGCCCGT<br/> CACGCCATGGGAGTTAGTTTTACCTGAAGGTGGTGAAGTCAACCGCAAGAGGCAGCCAACCCAGGTAATAATTAGCGACT<br/> GGGGTG</p>                                              |
| <i>B. abortus</i>      | <p>TAATACGACTCACTATAGGGCCCCGCAAGGGGAGCGGCAGACGGGTGAGTAACGCGTGGGAACGTACCATTGCTAC<br/> GGAATAACTCAGGGAACCTTGTGCTAATACCGTATGTGCCCTTCGGGGAAAGATTTATCGGCAATGATCGGCCCGC<br/> GTTGGATTAGTGTGGTGGGGTAAAGGCTACCAAGCGCAGATCCATAGCTGGTCTAGAGAGGATGATCAGCCAC<br/> ACTGGGACTGAGACACGGCCAGACTCTACGGGAGGCAGTGGGGAATATTGGACAATGGGCGCAAGCCTGATC<br/> CAGCATGCCCGTGAAGTGAAGGCCCTAGGGTTGTAAAGCTCTTTCACCGGTGAAGATAATGACGGTAACCGGA<br/> GAAGAAGCCCCGGCTAACTTCGTGCCAGCAGCCGCGTAAATACGAAGGGGGCTAGCGTTGTTTCGGATTACTGGGCG<br/> TAAAGCGCACGTAGGCGGACTTTTAAAGTCAAGGGTGAATCCCGGGGCTCAACCCCGGAACCTTTGATACTGGA<br/> AGTCTTGAGTATGGTAGAGGTGAGTGGAAATCCGAGTGTAGAGGTGAAATTCGTAGATATTTCGGAGGAACACAGTG<br/> GCGAAGGCGGCTCACTGGACCATTACTGACGCTGAGGTGCGAAAGCGTGGGGAGCAAAACAGGATTAGATACCCTGGT<br/> AGTCCACGCCGTAACGATGAATGTTAGCCGTCGGGGTGTTTACACTTCGGTGGCGAGCTAACGCATTAACACTCC<br/> GCCTGGGAGTACGGTCCGAAGATTAACACTCAAAGGAATTGACGGGGGCCCCGCAAGCGGTGGAGCATGTGGTTT<br/> AATTCGAAGTCAACCGCAGAACCTTACCAGCCCTGACATCCCGTCCGCGTTAGTGGAGACTACTCTTCAGTTAG<br/> GCTGGACCGGAGACAGGTGCTGCATGGTGTGCTCAGCTCGTGTGAGATGTTGGGTTAAGTCCCGCAACGAGCGC<br/> AACCTTCGCCCTTAGTTGCCAGATTAGTTGGGCACTTAAGGGGACTGCCGGTATAAGCCGAGAGGAAGGTGGG<br/> GATGACGTCAGTCTCATGCCCCCTACGGGCTGGGCTACACACGCTGCTACAATGGTGTGACAGTGGGCGAGCGAGC<br/> ACGGAGTGTGAGCTAATCTCCAAAAGCCATCTCAGTTCGAGTGTGCACTGCAACTCGAGTCAATGGAATGGAATC<br/> GCTAGTAATCGCGGATCAGCATGCCGCGGTGAATACGTTCCCGGGCCTGTACACACCCGCCGTCACACCATGGGAGT<br/> TGGTTTTACCGAAGGCGCTGTGCTAACCGCAAGGAGGCAGGCGACCACGGTAGGGTACGCGACTGGGGTG</p>                                                                         |
| <i>S. aureus</i>       | <p>TAATACGACTCACTATAGGGAACGGACGAGAAGCTTGTCTCTGATGTTAGCGGCGGACGGGTGAGTAACACGTGG<br/> ATAACCTACCTATAAGACTGGGATAACTTCGGGAAACCGGAGCTAATACCGGATAATATTTTGAACCGCATGGTTCAA<br/> AAGTGAAGACGGTCTTGTCTCACTTATAGATGGATCCCGCTGCATTAGCTAGTTGGTAAAGTAAACCGCTTACCA<br/> GGCAACGATACGTAGCCGACCTGAGAGGGTGTATCGGCCACTGGAAGTGAACACCGTCCAGACTCTACGGGAGG<br/> CAGCAGTAGGGAATCTCCGCAATGGGCGAAAGCCTGACGGGACACCGCCGCTGAGTGTGAAGGTCTTCGGATCG<br/> TAAACTCTGTTATTAGGGAAGAACATATGTGTAAAGTAACTGTGCACATCTTGACGGTACTTAATCAGAAAAGCCACGG<br/> CTAACTAGTCCAGCAGCCGCGTAAATACGTAGGTGAAGTGAAGCGTTATCCGGAATATTGGGCGTAAAGCGCGCTA<br/> GGCGGTTTTTTAAGTCTGATGTGAAAGCCCACGGCTCAACCGTGGAGGGTCAATTGAAAACCTGGAAAACCTGAGTGCAG<br/> AAGAGGAAAGTGAATTCATGTGTAGCGGTGAAATGCGCAGAGATATGGAGGAACACAGTGGCGAAGGCGACTTT<br/> CTGGTCTGTAAGTGAAGTGTGGGGTTTCCGCCCTTAGTGTGACGCTAAGCATTAAAGCCTAGCTGCTGGGAGTA<br/> CGACCGCAAGGTTGAAAACCTCAAAGGAATTGACGGGGACCCGCAACGCGGTGGAGCATGTGGTTAATTCGAAGCAA<br/> CGCAAGAACCTTACCAATCTTGACATCTTTGACAACCTTAGAGATAGAGCCTTCCCCTTCGGGGGACAAAAGTGAC<br/> AGGTGGTGCATGGTTGCTCAGCTCGTGTGAGATGTTGGGTTAAGTCCCGCAACGAGCGCAACCCCTAAGCTTA<br/> GTTGCCATTAAGTTGGGCACTTAAGTTGACTCCGGTGACAAACCGGAGGAAGTGGGGATGACGTCATAATCA<br/> TCAATGCCCTTATGATTTGGGCTACACACGCTGCTACAATGGCAATAACAAAGGGCAGCGAAACCCGAGGTCAGCA<br/> AATCCCATAAAGTTGTTCTCAGTTCGGATTGATGCTGCAACTGACTACATGAAGCTGGAATCGCTAGTAATCGTAG<br/> ATCAGCATGCTACGGTGAATACGTTCCCGGGTATTGTACACACCCCGCTCACACCAGGAGGTTTGAATACCCGAA<br/> GCCGGTGGAGTAACCTTTTAGGAGCTAGCCGTCGAAGGTGGGACAAATGATTGGGGTG</p>                                                                            |

**Table S2** Sequence information targeting the 3'-end of each 16S rDNA sequence.

| Name                      | Sequence (5' to 3') <sup>[a]</sup>                                 |
|---------------------------|--------------------------------------------------------------------|
| T716UP8U-F                | TCGAUCCUGCGAAAUG <u>UAAUACGACU</u> CTAUAGGGUGACCACAACGGTTTCCCTCTAG |
| T7P                       | TAATACGACTCACTATAGG                                                |
| T7T-R                     | CAAAAAACCCCTCAAGACCCGTTTA                                          |
| <i>F. tularensis</i> -R   | CACCCCAGTCATGAATCACT                                               |
| <i>Y. pestis</i> -R       | CACCCCAGTCATGAATCACAAAGT                                           |
| <i>V. cholerae</i> -R     | CACCCCAGTCATGAACCACA                                               |
| <i>E. coli</i> -R         | CACCCCAGTCATGAATCACAAAGT                                           |
| <i>B. pseudomallei</i> -R | CACCCCAGTCATGAATCCTACC                                             |
| <i>R. conorii</i> -R      | CACCCCAGTCGCTAATTTTACCG                                            |
| <i>B. abortus</i> -R      | CACCCCAGTCGCTGA                                                    |
| <i>S. aureus</i> -R       | CACCCAATCATTGTCCACC                                                |

[a] Underlined letters indicate T7 promoter sequence

**Table S3** Sequence information of pK7/dT7P-sfGFP constructs.

|                |                                                                                                                                                                                                                                                                                                                                                                                                                                                                                                                                                                                                                                                                                                                                                                                                                                                                                                                                                                                                                                                                                                                                                                                                                                                                                                                                                                                                                                                                                                                                                                                                                                                                                                                                                                                                                                                                                                                                                                                                                                                                                                                                                                                                                                                                                                                                                                                                                                                                                                                                                                                                                                                                                                                                                                                                                                                                                                                                                                                                                                                                                                                                                                                                                                                                                                                                                                                                                                                                                                                                                               |
|----------------|---------------------------------------------------------------------------------------------------------------------------------------------------------------------------------------------------------------------------------------------------------------------------------------------------------------------------------------------------------------------------------------------------------------------------------------------------------------------------------------------------------------------------------------------------------------------------------------------------------------------------------------------------------------------------------------------------------------------------------------------------------------------------------------------------------------------------------------------------------------------------------------------------------------------------------------------------------------------------------------------------------------------------------------------------------------------------------------------------------------------------------------------------------------------------------------------------------------------------------------------------------------------------------------------------------------------------------------------------------------------------------------------------------------------------------------------------------------------------------------------------------------------------------------------------------------------------------------------------------------------------------------------------------------------------------------------------------------------------------------------------------------------------------------------------------------------------------------------------------------------------------------------------------------------------------------------------------------------------------------------------------------------------------------------------------------------------------------------------------------------------------------------------------------------------------------------------------------------------------------------------------------------------------------------------------------------------------------------------------------------------------------------------------------------------------------------------------------------------------------------------------------------------------------------------------------------------------------------------------------------------------------------------------------------------------------------------------------------------------------------------------------------------------------------------------------------------------------------------------------------------------------------------------------------------------------------------------------------------------------------------------------------------------------------------------------------------------------------------------------------------------------------------------------------------------------------------------------------------------------------------------------------------------------------------------------------------------------------------------------------------------------------------------------------------------------------------------------------------------------------------------------------------------------------------------------|
| pK7/dT7P-sfGFP | <p>AGTGAGCGAGGAAGCGGAAGAAGCTCGCACATTCAGCAGCGTTTTTCAGCGCGTTTTTCGATCAGCGTTTTCAATGTTGG<br/> TATCAACACCAGGTTAACTTTGAACTTATCGGCACTGACGGTACTGATTTTGAACCTTTGCTTTGCCACGGAACGGT<br/> CTGCGTTGTCCGGGAAGATGCGTGATCTGATCCTTCAACTCAGCAAAAAGTTTCGCCAATACGCAAACCGCCTCTCCCGC<br/> GCGTTGGCCGATTCAATTAATGCAGCTGGCACGACAGGTTTCCCGACTGGAAAGCGGGCAGTGAGCGCAACGCAATTA<br/> ATGTGAGTTAGCTCACTCATTAGGCACCCAGGCTTACACGACCACAACGGTTTTCCCTCTAGAAATAATTTTGTTTAA<br/> CTTTAAGAAGGAGATATACATATGAGCAAAGGTGAAGAACTGTTTACCGGCGTTGTGCCGATTCTGGTGGAAC<br/> GGATGGCGATGTGAACGGTCAAAAATTAGCGTGCCTGGTGAAGGTGAAGGCGATGCCACGATTGGCAAACCTG<br/> ACGCTGAAATTTATCTGCACCACCGGCAAACTGCCGGTGCCGTGGCCGACGCTGGTGACCACCTGACCTATG<br/> GCGTTCAAGTGTTTTAGTCGTATCCGGATCACATGAAACGTACAGATTTCTTTAAATCTGCAATGCCGGAAGGC<br/> TATGTGACAGGAACGTACGATTAGCTTTAAAGATGATGGCAAATATAAAACGCGCGCCGTTGTGAAATTTGAAG<br/> GCGATACCCTGGTGAACCGCATTGAACTGAAAGGCACGGATTTTAAAGAAGATGGCAATATCCTGGGCCATAA<br/> ACTGGAATACAACCTTTAATAGCCATAATGTTTATATTACGGCGGATAAAACAGAAAAATGGCATCAAAGCGAATT<br/> TTACCGTTCGCCATAACGTTGAAGATGGCAGTGTGACGCTGGCAGATCATTATCAGCAGAATACCCCGATTGGT<br/> GATGGTCCGGTGTCTGCTGCCGATAATCATTATCTGAGCACGCAGACCGTTCTGTCTAAAGATCCGAAACGAAA<br/> AACGGGACCACATGGTCTGCACGAATATGTGAATGCGGCAGGTATTACGTGGAGCCATCCGCAGTTCGAAAA<br/> AGGTGGTTCTCATCACCATCACCATCACTAATAAGTCGACCGGCTGCTAACAAAGCCCGAAGGAAGCTGAGTTGG<br/> CTGCTGCCACCGCTGAGCAATAACTAGCATAACCCCTTGGGGCCTTAAACCGGCTTTGAGGGGTTTTTGTCTGAAAG<br/> GAGGAATTTATTCATATCAGGATTATCAATACCATATTTTTGAAAAAGCCGTTTCTGTAATGAAGGAGAAAACTAC<br/> CGAGGCAGTTCATAGGATGGCAAGATCCTGGTATCGGTCTGCGATTCCGACTCGTCCAACATCAATACAACCTATTA<br/> ATTTCCCTCGTCAAAAATAAGGTTATCAAGTGAGAAATCACCATGAGTGACGACTGAATCCGGTGAGAATGGCAAA<br/> AGCTTATGCATTTCTTTCCAGACTTGTTCACAGGCCAGCCATTACGCTCGTCATCAAAATCACTCGCATCAACCAAAAC<br/> CGTTATTCATTCGTGATTGCGCTGAGCGAGACGAAATACGCGATCGCTGTTAAAAGGACAATTACAAACAGGAATCG<br/> AATGCAACCGGCGCAGGAACACTGCCAGCGCATCAACAATATTTTACCTGAATCAGGATATTCTTCTAATACCTGGA<br/> ATGCTGTTTTCCCGGGGATCGCAGTGGTGAGTAACCATGCATCATCAGGAGTACGGATAAAATGCTTGATGGTCGGAA<br/> GAGGCATAAATCCGTCAGCCAGTTAGTCTGACCATCTCATCTGTAACATCATTGGCAACGCTACCTTTGCCATGTTT<br/> CAGAAACAACCTGGCGCATCGGGCTCCCATACAATCAGATAGATTGTCGCACCTGATTGCCGACATTATCGCGAGC<br/> CCATTTATACCCATATAAATCAGCATCCATGTTGGAATTTAATCGCGGCTTCGAGCAAGACGTTTCCCGTTGAATATGG<br/> CTCATAACACCCCTTGTATTACTGTTTATGTAAGCAGACAGTTTTATTGTTTCATGATGATATATTTTTATCTGTGCAAT<br/> GTAACATCAGAGATTTTGAGACACAACGTGGCTTTGTTGAATAAATCGAACTTTTGTGAGTTGAAGGATCAGATCAC<br/> GCATCTTCCCGACAACGCAGACCGTTCGGTGGCAAAGCAAAAAGTTCAAAATCACCAACTGGTCCACCTACAACAAG<br/> CTCTCATCAACCGTGGCTCCCTCACTTTCTGGCTGGATGATGGGGCGATTACGGCTGGTATGAGTCAGCAACACCTTC<br/> TTCACGAGGCAGACCTCTCGACGGATCGTTCCACTGAGCGTCAGACCCCGTAGAAAAGATCAAAGGATCTTCTTGAGA<br/> TCCTTTTTTCTGCGCGTAATCTGCTGCTTGCAAACAAAAAACCACCGCTACCAGCGGTGGTTTGTGTTGCCGGATCAA<br/> GAGTACCAACTCTTTTCCGAAGGTAACCTGGCTTCAGCAGAGCGCAGATACCAAACTACTGTCCTTCTAGTGTAGCCG<br/> TAGTTAGGCCACCCTTCAAGAACTCTGTAGCACCGCTACATACCTCGCTCTGCTAATCCTGTTACCAGTGGCTGCTG<br/> CCAGTGGCGATAAGTCGTGTCTTACCGGTTGGACTCAAGACGATAGTTACCGGATAAAGGCGCAGCGGTCCGGCTGA<br/> ACGGGGGGTTCGTGCACACAGCCAGCTTGAGAGCAACGACCTACACCGAAGTACCTACAGCGTGAGCATTG<br/> AGAAAGCGCCACGCTTCCCGAAGGGAGAAAGGCGGACAGGTATCCGGTAAAGCGGCAGGGTCCGAAACAGGAGAGCGC<br/> ACGAGGGAGCTTCCAGGGGAAACGCTGGTATCTTTATAGTCTGTGCGGTTTCGCCACCTCTGACTTGAGCGTCA<br/> TTTTTGTGATGCTCGTCAGGGGGCGGAGCCTATGAAAAACGCCAGCAACGCGGCCTTTTACGGTTCCTGGCCTTTT<br/> GCTGGCCTTTTGTCTACATGTTCTTCTGCGTTATCCCTGATTCTGTGGATAACCGTATTACCGCCTTTGAGTGAGCT<br/> GATACCGCTCGCCGAGCCGAACGACCGAGCGCAGCGAGTC</p> |
|----------------|---------------------------------------------------------------------------------------------------------------------------------------------------------------------------------------------------------------------------------------------------------------------------------------------------------------------------------------------------------------------------------------------------------------------------------------------------------------------------------------------------------------------------------------------------------------------------------------------------------------------------------------------------------------------------------------------------------------------------------------------------------------------------------------------------------------------------------------------------------------------------------------------------------------------------------------------------------------------------------------------------------------------------------------------------------------------------------------------------------------------------------------------------------------------------------------------------------------------------------------------------------------------------------------------------------------------------------------------------------------------------------------------------------------------------------------------------------------------------------------------------------------------------------------------------------------------------------------------------------------------------------------------------------------------------------------------------------------------------------------------------------------------------------------------------------------------------------------------------------------------------------------------------------------------------------------------------------------------------------------------------------------------------------------------------------------------------------------------------------------------------------------------------------------------------------------------------------------------------------------------------------------------------------------------------------------------------------------------------------------------------------------------------------------------------------------------------------------------------------------------------------------------------------------------------------------------------------------------------------------------------------------------------------------------------------------------------------------------------------------------------------------------------------------------------------------------------------------------------------------------------------------------------------------------------------------------------------------------------------------------------------------------------------------------------------------------------------------------------------------------------------------------------------------------------------------------------------------------------------------------------------------------------------------------------------------------------------------------------------------------------------------------------------------------------------------------------------------------------------------------------------------------------------------------------------------|

Underlined letters indicate T716UP8U-F binding region

Bold letters indicate sfGFP sequence

**Table S4** Sequence information of IA and TASER probes.

| Target pathogen        | Flap probe <sup>[b]</sup>                                                             | Invasive probe              |
|------------------------|---------------------------------------------------------------------------------------|-----------------------------|
| <i>F. tularensis</i>   | TCGATCCTGCGAAATGCTCGCACCT* <b>T</b> * <b>C</b> * <b>G</b> * <b>C</b> * <b>A</b>       | ACCTTTTGTAGTTTCGCTCCAA      |
| <i>Y. pestis</i>       | TCGATCCTGCGAAATGGCTCTCGCG* <b>A</b> * <b>G</b> * <b>T</b> * <b>T</b> * <b>C</b>       | GACTTTATGTGGTCCGCTA         |
| <i>V. cholerae</i>     | TCGATCCTGCGAAATGATTCTAGGTT* <b>G</b> * <b>A</b> * <b>G</b> * <b>C</b> * <b>C</b>      | CTCTAGCTTGTGTCAGTTTCAAATGCA |
| <i>E. coli</i>         | TCGATCCTGCGAAATGTTCTGTGGATGTC* <b>A</b> * <b>A</b> * <b>G</b> * <b>A</b> * <b>C</b>   | CACCAATCCATCTCTGGAAAA       |
| <i>B. pseudomallei</i> | TCGATCCTGCGAAATGCGTAGCAACTAAGGA* <b>C</b> * <b>A</b> * <b>A</b> * <b>G</b> * <b>G</b> | GCAGTCTCCTTAGAGTGCTCTTA     |
| <i>R. conorii</i>      | TCGATCCTGCGAAATGTCGCCGTCTTG* <b>C</b> * <b>T</b> * <b>T</b> * <b>C</b> * <b>C</b>     | GATGTCTTTTAGGGATTGCTCCACA   |
| <i>B. abortus</i>      | TCGATCCTGCGAAATGCGCGTTGCTTCGAAT* <b>T</b> * <b>A</b> * <b>A</b> * <b>A</b> * <b>C</b> | TCAAGGGCTGGTAAGGTTCTA       |
| <i>S. aureus</i>       | TCGATCCTGCGAAATGCGCATTTAC* <b>C</b> * <b>G</b> * <b>C</b> * <b>T</b> * <b>A</b>       | ACTGGTGTTCCTCCATATCTCTA     |

[b] \* indicates the phosphorothioate bond. Bold letters indicate the nucleotides with 2'-O-methoxy-ethyl (2'MOE) modifications.

**Table S5** Sequence information of IA and TASER probes for *E. coli* before optimization.

| Target pathogen | Flap probe <sup>[b]</sup>                                                        | Invasive probe      |
|-----------------|----------------------------------------------------------------------------------|---------------------|
| <i>E. coli</i>  | TCGATCCTGCGAAATGAGACTCAAGC* <b>T</b> * <b>T</b> * <b>G</b> * <b>C</b> * <b>C</b> | GAATTCTACCCCCTCTACA |

[b] \* indicates the phosphorothioate bond. Bold letters indicate the nucleotides with 2'-O-methoxy-ethyl (2'MOE) modifications.

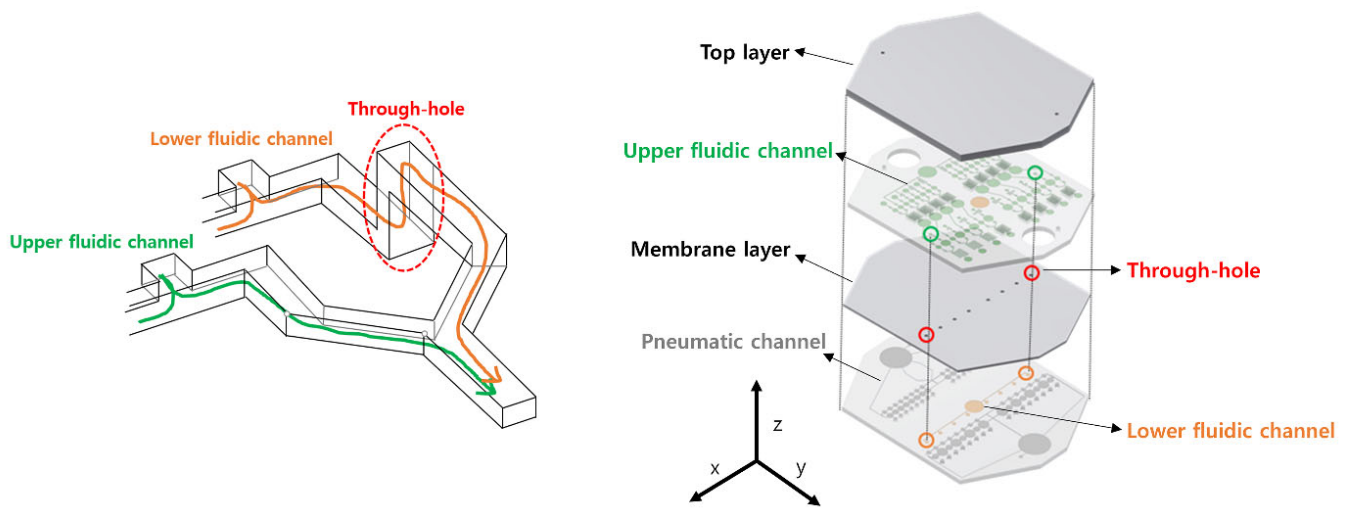

**Fig. S1** Schematic of the interconnection between the upper and lower fluidic channels via through-hole. Layer-by-layer schematic of through-hole embedded PAMD. The embedded through-hole structure allows two fluidic paths in a single device.

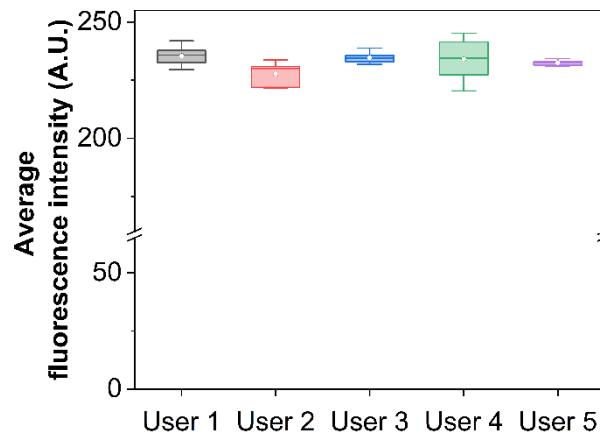

**Fig. S2** Reproducibility test based on multiple users. Each sample containing  $1 \mu\text{M}$  of *E. coli* 16S rRNA was aliquoted and mixed with IA-TASER reagents via the pushbutton operation ( $n = 3$ ).

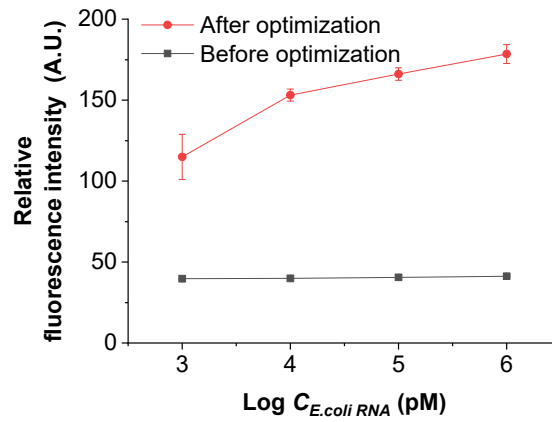

**Fig. S3** Performance comparison using non-optimized and optimized invasive and flap probes in the IA-TASER assay.

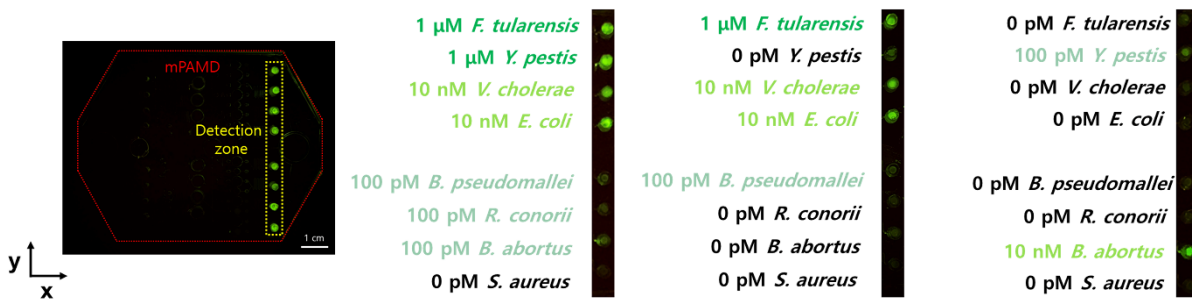

**Fig. S4** Enlarged images of the detection zone showing sfGFP fluorescence signals from various concentrations of 16S rRNA captured with the hand-held transilluminator.

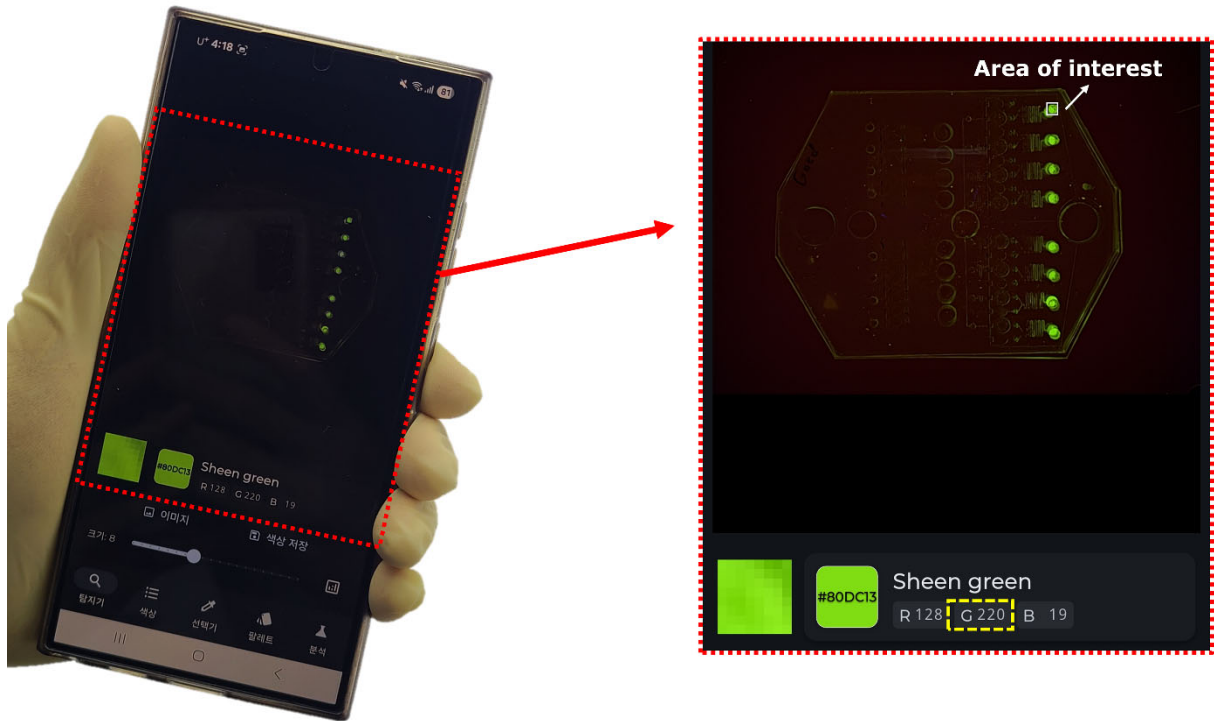

**Fig. S5** Representative image showing the analysis of sfGFP fluorescence intensity in the mPAMD using a smartphone app.
